RESEARCH ARTICLE

# Maternal occupational noise exposure during pregnancy and children's early language acquisition

Soile Jungewelter<sup>1,2☯\*</sup>, Helena Taskinen<sup>1,2☯</sup>, Markku Sallmén<sup>1</sup>,  
Marja-Liisa Lindbohm<sup>1,3☯</sup>, Erkki Airo<sup>1</sup>, Jouko Remes<sup>1</sup>, Minna Huotilainen<sup>4</sup>,  
Eira Jansson-Verkasalo<sup>5</sup>

**1** Finnish Institute of Occupational Health, Helsinki, Finland, **2** University of Helsinki, Helsinki, Finland, **3** University of Tampere, Tampere, Finland, **4** Institute for Behavioral Sciences, University of Helsinki, Cognitive Brain Research Unit, Helsinki, Finland, **5** Department of Psychology and Speech-Language Pathology, University of Turku, Turku, Finland

☯ These authors contributed equally to this work.

\* [soile.jungewelter@ttl.fi](mailto:soile.jungewelter@ttl.fi)

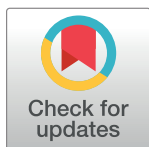

## OPEN ACCESS

**Citation:** Jungewelter S, Taskinen H, Sallmén M, Lindbohm M-Liisa, Airo E, Remes J, et al. (2024) Maternal occupational noise exposure during pregnancy and children's early language acquisition. PLoS ONE 19(4): e0301144. <https://doi.org/10.1371/journal.pone.0301144>

**Editor:** Emily W. Harville, Tulane University School of Public Health and Tropical Medicine, UNITED STATES

**Received:** July 2, 2023

**Accepted:** March 11, 2024

**Published:** April 16, 2024

**Copyright:** © 2024 Jungewelter et al. This is an open access article distributed under the terms of the [Creative Commons Attribution License](https://creativecommons.org/licenses/by/4.0/), which permits unrestricted use, distribution, and reproduction in any medium, provided the original author and source are credited.

**Data Availability Statement:** Data that supports the findings of this work are stored at the Finnish Institute of Occupational Health. The data are not available for other than the named research group members, who have adhered to full confidentiality concerning the sensitive information on the participants. All data of the study are protected due the privacy legislation in Finland, the regulations concerning the good data protection practices at the Finnish Institute of Occupational Health and the conditions in the permission for the research

## Abstract

### Introduction

Noise exposure during pregnancy may affect a child's auditory system, which may disturb fetal learning and language development. We examined the impact of occupational noise exposure during pregnancy on children's language acquisition at the age of one.

### Methods

A cohort study was conducted among women working in the food industry, as kindergarten teachers, musicians, dental nurses, or pharmacists who had a child aged  $\leq 1$  year. The analyses covered 408 mother-child pairs. Language acquisition was measured using the Infant-Toddler Checklist. An occupational hygienist assessed noise exposure individually as no (N = 180), low (70–78 dB; N = 108) or moderate/high exposure ( $\geq 79$  dB; N = 120).

### Results

Among the boys, the adjusted mean differences in language acquisition scores were -0.4 (95% CI -2.5, 1.8) for low, and -0.7 (95% CI -2.9, 1.4) for moderate/high exposure compared to no exposure. Among the girls the respective scores were +0.1 (95% CI -2.2, 2.5) and -0.1 (95% CI -2.3, 2.2). Among the children of kindergarten teachers, who were mainly exposed to human noise, low or moderate exposure was associated with lower language acquisition scores. The adjusted mean differences were -3.8 (95% CI -7.2, -0.4) for low and -4.9 (95% CI -8.6, -1.2) for moderate exposure.

### Conclusions

In general, we did not detect an association between maternal noise exposure and children's language acquisition among one-year-old children. However, the children of

project by the Coordinating Ethical Committee of the Hospital District of Helsinki and Uusimaa (approval number 54/13/03/00/13). The data protection and the Data permits for datasets of the Finnish Institute of Occupational Health can be found on the Finnish Institute of Occupational Health website via Data Protection | Finnish Institute of Occupational Health ([tth.fi](https://tth.fi)) The corresponding author can answer questions which arise by interested readers. [soile.jungewelter@tth.fi](mailto:soile.jungewelter@tth.fi) For questions about the data restrictions, please contact the head of our Digi and data -section of our institute [aki.koskinen@tth.fi](mailto:aki.koskinen@tth.fi) Several Finnish and EU laws, regulations and agreements contain confidentiality and data security obligations that concern FIOH. The guiding principle is that information, the disclosure of which jeopardises the realisation of essential private or public interests, must not be disclosed and must be properly protected. FIOH may act in various data protection roles. These roles include the data controller, the joint controller and the processor of personal data. Different roles entail different obligations. As a data controller, FIOH defines the purposes and ways of processing personal data. FIOH's registers include, for instance, statutory personal data registers, personal data registers created in connection with research and client registers. The data controller has a significant responsibility for the appropriate processing of personal data as well as for informing data subjects and ensuring that their rights are realized. In register maintenance, the data controller is always FIOH and not an individual employee, with the exception of the status of a visiting researcher conducting independent research; there are separate quality instructions (JOHTO-TO-009-L06) for this.

**Funding:** This work was financially supported by The Finnish Work Environment Fund [grant number 112238]. The grant was addressed to FIOH. The sponsor did not play any role in the study design, data collection and analysis, decision to publish or preparation of the manuscript. <https://www.tsr.fi/briefly-in-english/>

**Competing interests:** The authors have declared that no competing interests exist.

kindergarten teachers exposed to human noise had lower language acquisition scores than the children of the non-exposed participants. These suggestive findings merit further investigation by level and type of exposure.

## Introduction

Noise is known to penetrate the tissues and fluids surrounding the fetal head and to stimulate the inner ear through bone conduction. The abdominal wall and uterus attenuate some noises, allowing the fetus to hear predominately low-frequency sounds. High-frequency sounds in turn are greatly attenuated by the abdomen [1,2].

Environmental factors play an important role in the development of a child's auditory processing and language acquisition. Auditory processing develops early, and fetuses are able to discriminate between the sounds that they hear [3].

Studies of rats have shown that compared to music, prenatal noise weakens brain development and therefore possibly also the development of the auditory system [4,5].

Findings among humans have indicated delays in the language development of prematurely born infants who have spent their first weeks (last trimester) in the sound environment of neonatal intensive care units. Some researchers have proposed that these delays could partially be related to differences in the sound environment, as these units typically offer more machine-like sounds than language-related sounds [6–8].

A study of neonates has shown that acoustic noise changes the processing of sounds in the brain [9]. Another study has revealed that compared to silence, short-term exposure of two-year-old children to acoustic noise affects the brain processes related to sound processing [10]. This may in turn affect a child's language acquisition, and possibly lead to a weakened ability to learn concepts [11], which is detrimental to the overall ability to learn. Such damage might limit a child's ability to study, graduate and build a successful career as an adult.

Several environmental factors have been observed as affecting a child's language acquisition. During the first year, children usually learn to comprehend words and speech, and to use the sounds they hear in their babbling and their first words [12]. Listening to music and a mother's story-telling supports language acquisition, whereas background noise and the insensitiveness of a mother have been linked to delayed language acquisition [13–17]. Neurally, noise degrades central auditory processing [18], which is fundamental for language acquisition [11,12]. Delayed early language acquisition is a substantial risk factor for later language impairment [19].

The findings regarding the effect of prenatal noise exposure on hearing impairments among children have been conflicting. Two early reports [20,21] associated maternal exposure to high noise levels (85–95 dB or >100 dB) with hearing deterioration among children, but the studies were based on small samples and therefore had low precision. A later study [22] indicated no hearing impairment after exposure (>80 but <90 dB) but presented unspecific inclusion criteria. A recently published study [23], however, showed an association between occupational noise exposure (>85 dB) during pregnancy and hearing dysfunction among children.

We hypothesized that regular exposure to noise during pregnancy might affect the fetal auditory system in ways that could influence language development. Thus, the aim of our study was to investigate the potential impact of a mother's occupational noise exposure during pregnancy on the language acquisition of her child. We investigated whether prenatal

exposures to industrial noise, high frequency noise in dental clinics, human noise in kindergartens, and musical sounds in musicians' work affect children's language acquisition at the age of one. The impact of maternal noise exposure during pregnancy on a child's language acquisition has not been studied previously.

## Material and methods

### Participants and data collection procedure

The study population consisted of Finnish mothers working in sectors with or without occupational noise exposure and their children born between April 2013 and March 2014. We focused on occupational branches in which exposure to various types of noise was known to be present, and in which documented information on the range of noise or sound level in Finnish workplaces was available. Pharmacists were selected as the non-exposed control group. In Finland, 70% of working aged women were members of a trade union in 2013 (Ministry of Employment and the Economy). We identified 17 138 women at a fertile age of 18–45 from the members of five trade unions: kindergarten teachers (N = 3900), food industry workers (N = 6395), musicians (N = 937), dental nurses (N = 3283), and pharmacists (N = 2623). Using the personal identity codes of the women, we collected the data (birth date, gender, native language) on their children (singletons) between the ages of 6 weeks and 11 months from the Population Register Centre. On the mother, we collected the following information: native language, address, and ages of all biological children. We restricted the population to Finnish-speaking mothers, and obtained data on 187 kindergarten teachers, 291 food industry workers, 48 musicians, 137 dental nurses, and 192 pharmacists: 855 mother-child pairs in total. Data on exposure and language acquisition were collected using several questionnaires, in two phases (Fig 1).

**Phase 1.** The Baseline questionnaire was sent at the same time to all the 855 women found from among the five trade union members. The children were then between 6 weeks and 11 months old. The questionnaire focused on background factors such as maternal employment,

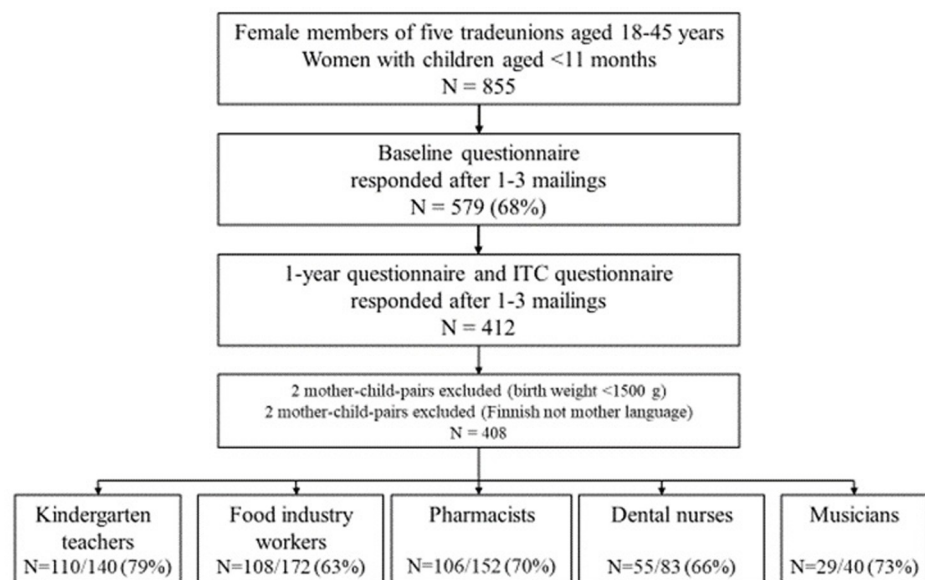

**Fig 1. Flow chart of data collection and participation at baseline and when child was one (ITC = Infant-Toddler Checklist).** Percentages in brackets (%) indicate proportion of women who returned questionnaire.

<https://doi.org/10.1371/journal.pone.0301144.g001>

detailed work task descriptions, and exposure to occupational noise and stress during pregnancy. The questions on noise were a) "During your pregnancy, did the noise in your working environment disturb normal conversation?", b) "During your pregnancy, was the noise in your work environment so loud that you could not hear normal speech from one meter's distance?". The weekly duration of such noise and the use of hearing protection devices were also elicited. These kinds of questions have been found to be practical for estimating noise level [24]. A study of construction workers by Neitzel [25] showed that trade was a poor predictor of noise exposure, whereas an internal validation study indicated good agreement between worker self-reporting and researcher observation. We also requested information on exposure to high-level leisure-time noise, its frequency (daily/weekly/more seldom) and the activity that caused it. Furthermore, we asked whether the women experienced stress (on a five-point Likert scale varying from 1 "not at all" to 5 "very much") during pregnancy and after birth. This question has shown to be valid for group-level analysis [26].

**Phase 2a.** The One-year background questionnaire included questions on the health (chronic diseases diagnosed by a physician before, during and after pregnancy as well as potential hearing problems) of the mother. It had detailed questions on the routine hearing tests (otoacoustic emission measurements) of the newborn child, ear infections, hospital treatments, malformations, and developmental disorders or other diseases or injuries during the child's first year of life. We also asked about possible day care, and the mothers' lifestyle factors (smoking or alcohol use). Communication between the mother and the child (frequency and duration of talking, reading and singing to the child, and the group activities of the child) was covered in detail in the questionnaire. Possible familiar first and second degree language acquisition disorders among relatives were elicited. We also asked about parental education (low = 9 years primary school; mid-level = high school or vocational school; high = university or university of applied sciences), and mother's exposure to ototoxic substances such as solvents, metals, or other chemicals.

**Phase 2b.** Data on the language acquisition of the child at the age of one were collected using the Finnish version of the Infant-Toddler Checklist (ITC) [27] called Esikko [28]. The ITC consists of 24 items (questions) organized into seven cluster areas that form three composites: social communication (expression of motions and eye gaze, communication, gestures), speech production (sounds, words) and language comprehension (language comprehension, object use). The maximum scores of the composites are: 26 for social communication, 14 for speech production, and 17 for language comprehension (57 in total). A higher score indicates a higher functioning. Total scores below 28 are typically referred to additional follow up consultations.

The Baseline questionnaire was sent to the 855 female trade union members three weeks to 11 months before their children turned one. Altogether 579 (68%) responded (Fig 1): 77% of the kindergarten teachers, 59% of the food industry workers, 79% of the dental nurses, 83% of the musicians, and 79% of the pharmacists. We sent the One-year background enquiry and ITC questionnaire (paper or web-based) to those who responded when their children turned one. Two reminders were sent if necessary. Altogether 412 (71% of baseline respondents and 48% of all the 855 women) women responded to both the One-year background questionnaire and the ITC questionnaire when their child was aged one year  $\pm$  1 weeks; 79% of the kindergarten teachers, 63% of the food industry workers, 66% of the dental nurses, 73% of the musicians, and 70% of the pharmacists. Children with a birth weight of <1500 g ( $N = 2$ ) and women with a mother tongue other than Finnish ( $N = 2$ ) were excluded. The final analyses consisted of 408 mother-child pairs.

## Exposure assessment

An experienced occupational hygienist assessed the noise exposure of the women during pregnancy by combining existing information on noise exposure at Finnish workplaces in their professions and the questionnaire data. The range of exposure and workplace noise levels in the target professional groups are well known and documented. We used both published research data and results from The Finnish Database of Occupational Exposure Measurements (FDOEM) maintained by the Finnish Institute of Occupational Health [29,30]. The questionnaires, in turn, elicited information on how the respondents were exposed to noise during pregnancy. The duration (no noise, noise <2 hours, 2–6 hours, 6–10 hours, >10 hours per week) of noisy events that disturbed or blocked speech communication (impossible to hear speech from a distance of one meter), type of identified noise sources at work, and the respondents' use of hearing protection were also used to help place each individual in the most plausible category within each occupational group. Noisy activities during leisure time were queried and classified separately. Exposure assessment was made blindly, without knowledge of the language acquisition of the child.

Exposure assessment among kindergarten teachers was based on two sets of data. In a FIOH research project in 25 randomly selected kindergartens, the range of daily noise exposure levels was 71–84 dB, and only in two of the 50 individual measurements did the level exceed 80 dB [29]. Thus, the majority of the kindergarten teachers was classified into the low-exposure category. However, in kindergartens in which the personnel reported disturbing noise and measurements were conducted (FDOEM), 67% of personal noise exposure measurements exceeded 80 dB. Therefore, teachers reporting weekly exposure to noise events that hindered communication were placed into the moderate exposure class.

Food industry work environments ranged from bakeries to food factories. The questionnaire asked about the individual type of work (bakery, meat processing, food service, packing, box washing line) and produced items. In previous measurements, exposure had ranged from low to >85 dB (FDOEM).

In dental care, noise producing equipment are: high-/slow-speed hand pieces, suction tubes, ultrasonic scalers, and compressed air. The exposure assessment was based on self-reported tool usage, and noise levels were reported elsewhere. In Finland, typical dental tool noise level has been measured as 78–83 dB, but internationally higher noise levels have also been reported [31,32].

We asked the musicians about their main and side instrument as well as singing, the size of their orchestra or group, type of music (classical, rock, chorus), and the weekly time of rehearsal, performances, and possible teaching lessons. Several projects have assessed musicians' noise exposure in Finnish professional orchestras and musical education. The sound level for symphony orchestra musicians is 83–96 dB, depending on instrument and position [30]. The majority of the musicians in our data were classical orchestra musicians. The others were either full-time or semi-professional performers of popular music genres. The sound level of amplified music during practice and performance was assumed to exceed 90 dB on the basis of measurements during concerts, in which levels of 95–105 dB have been registered (FDOEM).

Based on the questionnaires, the pharmacists were assessed as non-exposed. Occasional repair work nearby, for example, could cause low exposure.

Occupational noise exposure (the highest exposure level in any pregnancy trimester) was classified into one of the four categories:

1. Non-exposed: Environmental sounds come mostly from speaking, normal office equipment or home sounds.



2. Low exposure: The presence of environmental noise becomes noticeable and requires the use of a raised voice during conversation. Noise sources in these environments can be, for example, groups of people talking loudly, or quiet machinery or brief occurrences of higher level sounds. The approximate range of noise exposure level in this category is 70–78 dB.
3. Moderate exposure: Noise and loud sounds make conversation difficult but do not block it. The approximate range of daily noise exposure level is 79–84 dB. Many of these workers consider hearing protection useful.
4. High exposure: The sound or noise level is so high that conversation is difficult or blocked most of the working time, and the risk of hearing loss is high. Typical noise exposure is >85 dB, and the use of hearing protection is mandatory.

### Statistical analyses

We compared the language acquisition of children of mothers exposed to noise at work during pregnancy to the language acquisition of children of non-exposed working mothers. As a measure of language acquisition, we used the summary score of the ITC questionnaire and the scores of its three composites: social communication, speech production and language comprehension.

We used multivariable linear regression to assess the mean differences between the language acquisition scores in the occupational exposure categories. Statistical significance was determined by 95% confidence intervals (CI). Missing ITC score data were replaced by the mean values of each occupational group (one dental nurse and one pharmacist) in the single items. The analyses were performed using SAS 9.4<sup>®</sup> and IBM SPSS Statistics 23<sup>®</sup>.

Due to the small number of women in the highest category, the two highest noise exposure categories, moderate and high, were combined for statistical analyses. The exposed and non-exposed women in the four occupational groups were also analyzed separately, but not the musicians, because of their small number. Women who were not working during pregnancy ( $N = 54$ ) or did not work in the occupation corresponding to their trade union (9 dental nurses and 3 food industry workers) were excluded from these analyses. One musician and one dental nurse who worked in a kindergarten were transferred to the kindergarten teacher group.

On the basis of earlier studies, we identified a number of potential confounders on factors which may affect a child's language acquisition. The factors that were associated with language acquisition in our data, and which were included in the final multivariable models as potential confounders were maternal age (20–34 and 35–44 years), talking (<1 hour/day,  $\geq 1$  hour/day), looking at and reading books (not yet or occasionally, a few times a week, daily) and singing to the child (never or occasionally, a few times a week, daily). The boys and girls were analyzed separately, as their language acquisition scores clearly differed. However, we adjusted for gender in the analyses by occupational group. Other potential confounding factors, such as parental education, mother's use of alcohol, diabetes mellitus during pregnancy, history of acute otitis media, number of siblings, or language disorders among close relatives were not associated with the child's language acquisition and were therefore not included in the final models.

The following health conditions were very rare in our data (<5% of the observations) and were not included in the final models: preterm birth, low birth weight, low APGAR score, congenital abnormalities or postnatal diseases requiring hospital treatment, child's hearing loss, abnormal results in otoacoustic emission measurements as newborn (3 children), and mother's chronic diseases (mental disorders, hyperthyreosis or hypothyreosis, diabetes mellitus, or other serious illness diagnosed by a physician), maternal hepatogestosis, and smoking. The same applies to noise exposure during leisure time, because it was not associated with language

acquisition. Most children were taken care of at home (92.4%); only 7.6% ( $N = 31$ ) outside the home. Thus, for the majority, the noise was at normal family-life level.

## Ethics approval

The research plan was approved by the Coordinating Ethical Committee of the Hospital District of Helsinki and Uusimaa (approval number 54/13/03/00/13).

## Results

About 87% ( $N = 354$ ) of the mothers worked during their pregnancy. About 36% of these mothers were not exposed to occupational noise, 31% were exposed to low levels of noise, 21% to moderate noise, and 12% to high-level noise. Only the musicians and food industry workers were exposed to high-level noise.

The group of children of highly exposed mothers included more girls (66%) than boys (34%), whereas the sex ratio in other groups was even. [Table 1](#) shows further background characteristics by levels of noise exposure.

Time spent talking to their children was shorter among the non-exposed mothers than among the other mothers ([Table 2](#)). 46% read daily to their children. There were no systematic differences in terms of looking at and reading books between the exposure categories. The moderately or highly exposed mothers sang more often to their children than the mothers in other groups. There were no clear differences in terms of attending musical play school or other activities between the exposure groups.

There were no statistically significant differences between the language acquisition total scores of the boys or girls according to maternal exposure categories ([Table 3](#)). The girls achieved significantly higher language acquisition mean scores (35.8) than the boys (33.3) ( $P < 0.001$ ). Among the boys, the adjusted mean differences in ITC scores were -0.4 (95% CI -2.5, 1.8) for low exposure, and -0.7 (95% CI -2.9, 1.4) for moderate/high exposure, in comparison to the non-exposed. Among the girls these were +0.1 (95% CI -2.2, 2.5) and -0.1 (95% CI -2.3, 2.2), respectively ([Table 3](#)). Among the boys, reading and speaking to one's child was associated with high language acquisition scores, as well as maternal age at birth ( $< 35$  years) and working status during pregnancy. Among the girls, only reading was related to high scores.

No clear associations were found between noise exposure and the different composites of language acquisition including child's social communication, speech production and language comprehension ([Table 4](#)).

Analyses by occupational group were restricted to the mothers who worked during pregnancy ( $N = 354$ ) ([Table 5](#)). Compared to no exposure, low or moderate noise exposure was associated with lower language acquisition scores among the children of kindergarten teachers, and with language comprehension in particular. The adjusted mean score of this composite was 9.2 (mean difference -1.3 (95% CI -2.5, -0.1,  $P < 0.05$ )) for low exposure and 9.1 (mean difference -1.5, 95% CI -2.8, -0.2,  $P < 0.05$ ) for moderate exposure. The mean score for the non-exposed was 10.5 in comparison.

To test whether these associations could be explained by stress, as a sensitivity analysis we included maternal stress during pregnancy in the models. The results were virtually unchanged in terms of the total and composite scores. No associations between noise exposure and language acquisition were seen among the food industry workers. The children of the musicians had a relatively high mean total score (35.6). Due to small numbers, it was not possible to analyze their language acquisition by noise level.

Table 1. Characteristics of study participants by estimated occupational noise exposure during pregnancy.

| Characteristics                      | Occupational noise exposure |              |                   |               |
|--------------------------------------|-----------------------------|--------------|-------------------|---------------|
|                                      | No exposure                 | Low exposure | Moderate exposure | High exposure |
|                                      | N (%)                       | N (%)        | N (%)             | N (%)         |
| <b>Occupational group</b>            |                             |              |                   |               |
| Kindergarten teachers                | 15 (8)                      | 52 (48)      | 28 (37)           | 0 (0)         |
| Musicians                            | 2 (1)                       | 3 (3)        | 7 (9)             | 16 (36)       |
| Food industry workers                | 14 (8)                      | 19 (8)       | 25 (33)           | 28 (64)       |
| Dental nurses                        | 13 (7)                      | 20 (19)      | 16 (21)           | 0 (0)         |
| Pharmacists                          | 82 (46)                     | 14 (13)      | 0 (0)             | 0 (0)         |
| Unemployed                           | 54 (30)                     | -            | -                 | -             |
| Total                                | 180                         | 108          | 76                | 44            |
| <b>Child's mother</b>                |                             |              |                   |               |
| <i>Maternal age at birth (years)</i> |                             |              |                   |               |
| ≤35                                  | 147 (82)                    | 93 (86)      | 64 (84)           | 37 (84)       |
| >35                                  | 33 (18)                     | 15 (14)      | 12 (16)           | 7 (16)        |
| <i>Maternal education</i>            |                             |              |                   |               |
| Low                                  | 1 (1)                       | 0 (0)        | 3 (4)             | 3 (7)         |
| Mid-level                            | 45 (25)                     | 26 (24)      | 31 (41)           | 23 (52)       |
| High                                 | 134 (74)                    | 81 (75)      | 41 (54)           | 18 (41)       |
| Unknown                              | 0 (0)                       | 1 (1)        | 1 (1)             | 0 (0)         |
| <i>Smoking during pregnancy</i>      |                             |              |                   |               |
| Yes                                  | 6 (3)                       | 6 (6)        | 3 (4)             | 6 (14)        |
| No                                   | 174 (97)                    | 101 (94)     | 72 (95)           | 38 (86)       |
| Unknown                              | 0 (0)                       | 1 (1)        | 1 (1)             | 0 (0)         |
| <i>Alcohol use during pregnancy</i>  |                             |              |                   |               |
| Yes                                  | 14 (8)                      | 7 (7)        | 5 (7)             | 3 (7)         |
| No                                   | 166 (92)                    | 101 (94)     | 71 (93)           | 41 (93)       |
| <i>Stress during pregnancy</i>       |                             |              |                   |               |
| Not at all                           | 22 (12)                     | 17 (16)      | 10 (13)           | 4 (9)         |
| Only a little                        | 78 (43)                     | 41 (38)      | 34 (45)           | 22 (50)       |
| Some                                 | 62 (34)                     | 38 (35)      | 25 (33)           | 11 (25)       |
| Rather much/very much                | 18 (10)                     | 12 (11)      | 7 (9)             | 7 (16)        |
| <b>Child's father</b>                |                             |              |                   |               |
| <i>Paternal education</i>            |                             |              |                   |               |
| Low                                  | 4 (2)                       | 3 (3)        | 5 (7)             | 1 (2)         |
| Mid-level                            | 87 (48)                     | 58 (54)      | 33 (43)           | 25 (57)       |
| High                                 | 86 (48)                     | 45 (42)      | 36 (47)           | 17 (39)       |
| Unknown                              | 3 (2)                       | 2 (2)        | 2 (3)             | 1 (2)         |
| <b>Child</b>                         |                             |              |                   |               |
| <i>Gender</i>                        |                             |              |                   |               |
| Female                               | 87 (48)                     | 54 (50)      | 38 (50)           | 29 (66)       |
| Male                                 | 93 (52)                     | 54 (50)      | 38 (50)           | 15 (34)       |
| <i>Gestational age (weeks)</i>       |                             |              |                   |               |
| ≥37                                  | 178 (99)                    | 102 (94)     | 69 (91)           | 40 (91)       |
| <37                                  | 1 (1)                       | 4 (4)        | 3 (4)             | 3 (7)         |
| Unknown                              | 1 (1)                       | 2 (2)        | 4 (5)             | 1 (2)         |
| <i>Birth weight (grams)</i>          |                             |              |                   |               |

(Continued)



Table 1. (Continued)

| Characteristics                              | Occupational noise exposure |              |                   |               |
|----------------------------------------------|-----------------------------|--------------|-------------------|---------------|
|                                              | No exposure                 | Low exposure | Moderate exposure | High exposure |
|                                              | N (%)                       | N (%)        | N (%)             | N (%)         |
| <2500                                        | 1 (1)                       | 2 (2)        | 2 (3)             | 1 (2)         |
| <4500 but $\geq$ 2500                        | 174 (97)                    | 101 (94)     | 66 (87)           | 42 (96)       |
| $\geq$ 4500                                  | 5 (3)                       | 4 (4)        | 8 (11)            | 1 (2)         |
| Unknown                                      | 0 (0)                       | 1 (1)        | 0 (0)             | 0 (0)         |
| <i>Acute otitis media</i>                    |                             |              |                   |               |
| 0–2                                          | 164 (91)                    | 104 (96)     | 70 (92)           | 41 (93)       |
| $\geq$ 3                                     | 15 (8)                      | 4 (4)        | 5 (7)             | 3 (7)         |
| Unknown                                      | 1 (1)                       | 0 (0)        | 1 (1)             | 0 (0)         |
| <i>Congenital abnormalities</i>              |                             |              |                   |               |
| No                                           | 175 (93)                    | 105 (97)     | 72 (95)           | 44 (100)      |
| Yes                                          | 5 (3)                       | 3 (3)        | 4 (5)             | 0 (0)         |
| <i>Language disorders in close relatives</i> |                             |              |                   |               |
| No                                           | 167 (93)                    | 97 (90)      | 70 (92)           | 39 (89)       |
| Yes                                          | 10 (6)                      | 10 (9)       | 5 (7)             | 5 (11)        |
| Unknown                                      | 3 (2)                       | 1 (1)        | 1 (1)             | 0 (0)         |
| <i>Siblings</i>                              |                             |              |                   |               |
| 0                                            | 66 (37)                     | 45 (42)      | 39 (51)           | 25 (57)       |
| 1                                            | 70 (39)                     | 38 (35)      | 23 (30)           | 13 (30)       |
| $>2$                                         | 44 (24)                     | 25 (23)      | 14 (18)           | 6 (14)        |
| <i>Child at day care</i>                     |                             |              |                   |               |
| No                                           | 169 (94)                    | 98 (91)      | 67 (88)           | 41 (93)       |
| Yes                                          | 9 (5)                       | 10 (9)       | 9 (12)            | 3 (7)         |
| Unknown                                      | 2 (1)                       | 0 (0)        | 0 (0)             | 0 (0)         |

<https://doi.org/10.1371/journal.pone.0301144.t001>

## Discussion

### Principal findings

We found no clear association between maternal occupational noise exposure to low exposure (approximately 70–78 dB) or moderate and high exposure (approximately  $>79$  dB) and the child's language acquisition at one year of age in the entire data. The results were similar when we studied the three different composites of language acquisition: social communication, speech production and language comprehension. Accordingly, industrial noise among food industry workers or noise in dental clinics showed no association with children's language acquisition.

No previous studies have examined the effects of prenatal occupational noise exposure on the language acquisition of children at one year of age. Earlier studies have focused on prenatal noise exposure effects on hearing impairments among children [20–23], and the findings of these studies have been conflicting. Some studies have associated maternal exposure to high noise levels ( $>85$  dB) with hearing deterioration among children, whereas others have indicated no hearing impairment after exposure.

Among the children of the kindergarten teachers, who were mainly exposed to human noise, low or moderate noise exposure was associated with lower language acquisition scores. In addition to noise, stress during pregnancy might be a potential risk factor for lower language acquisition. Laplante [33] observed that stress during pregnancy affects the language

Table 2. Communication between mother and child and child's activities by estimated occupational noise exposure during pregnancy.

| Communication and activities                                              | Occupational noise exposure |              |                   |               |
|---------------------------------------------------------------------------|-----------------------------|--------------|-------------------|---------------|
|                                                                           | No exposure                 | Low exposure | Moderate exposure | High exposure |
|                                                                           | N (%)                       | N (%)        | N (%)             | N (%)         |
| <i>Talking to child</i>                                                   |                             |              |                   |               |
| Daily, <1 hour                                                            | 39 (22)                     | 13 (12)      | 5 (7)             | 6 (14)        |
| Daily, ≥1 hour                                                            | 140 (78)                    | 94 (87)      | 71 (93)           | 38 (86)       |
| Unknown                                                                   | 1 (1)                       | 1 (1)        | 0 (0)             | 0 (0)         |
| <i>Looking at or reading books to child</i>                               |                             |              |                   |               |
| Not yet or occasionally                                                   | 49 (27)                     | 21 (19)      | 12 (16)           | 15 (34)       |
| A few times a week                                                        | 54 (30)                     | 29 (27)      | 33 (43)           | 6 (14)        |
| Daily                                                                     | 77 (43)                     | 55 (51)      | 31 (41)           | 23 (52)       |
| Unknown                                                                   | 0 (0)                       | 3 (3)        | 0 (0)             | 0 (0)         |
| <i>Singing to child</i>                                                   |                             |              |                   |               |
| Never or occasionally                                                     | 16 (9)                      | 14 (13)      | 8 (11)            | 2 (5)         |
| A few times a week                                                        | 38 (21)                     | 26 (24)      | 10 (13)           | 8 (18)        |
| Daily                                                                     | 124 (69)                    | 68 (63)      | 58 (76)           | 34 (77)       |
| Unknown                                                                   | 2 (1)                       | 0 (0)        | 0 (0)             | 0 (0)         |
| <i>Child attends musical playschool</i>                                   |                             |              |                   |               |
| Yes                                                                       | 49 (27)                     | 25 (23)      | 20 (26)           | 12 (27)       |
| No                                                                        | 131 (73)                    | 83 (77)      | 56 (74)           | 32 (73)       |
| <i>Child participates in activities other than musical playschool</i>     |                             |              |                   |               |
| Yes                                                                       | 56 (31)                     | 30 (28)      | 19 (25)           | 14 (32)       |
| No                                                                        | 124 (69)                    | 78 (72)      | 57 (75)           | 30 (68)       |
| <i>Child participates in both musical playschool and other activities</i> |                             |              |                   |               |
| Yes                                                                       | 25 (14)                     | 8 (7)        | 8 (11)            | 7 (16)        |
| No                                                                        | 155 (86)                    | 100 (93)     | 68 (90)           | 37 (84)       |

<https://doi.org/10.1371/journal.pone.0301144.t002>

functioning of human toddlers. Stress could be either a confounding factor or an intermediate variable in the causal pathway from noise exposure to language acquisition. However, our analyses indicated no role for stress because the association of noise with children's language acquisition was virtually unchanged after adjustment for maternal stress during pregnancy.

Most of the musicians were exposed to moderate or high noise levels, but the ITC scores for their children were relatively high. Earlier studies [34] have shown music to have positive effects on language acquisition. Accordingly, a number of studies have revealed that children who undergo music training have stronger cognitive linguistic abilities, for example in vocabulary and perception, than children with no musical training [16].

Noise exposure in different trimesters may have different effects in the child's later development, but studies of the effects of noise on the human fetus during different stages of pregnancy are lacking. Some studies of pregnant animals have shown noise exposure to have adverse effects on fetal hearing during late pregnancy [35,36]. There is, however, a possibility of that noise can have an adverse effect on hearing even during the embryonic period in the first trimester, when the auditory system is developing. The otocyst embryonic stem cells can produce hair cell-like cells [37], and these cells may react to loud sounds. According to these studies, it is not possible to indicate the stage of pregnancy when noise could harm the fetus [23]. We used the highest estimate in any pregnancy trimester as the exposure estimate.

**Table 3. Crude and adjusted mean differences between ITC total language acquisition scores of one-year-old boys and girls by estimated noise exposure during pregnancy.** Adjusted for mother's age at birth; working status during pregnancy; and talking, reading and singing to one's child. A multivariable model.

| Variable                                        | Boys |            |                                     |          |           |           | Girls |            |                                     |          |           |           |
|-------------------------------------------------|------|------------|-------------------------------------|----------|-----------|-----------|-------|------------|-------------------------------------|----------|-----------|-----------|
|                                                 | N    | Mean score | Mean differences between ITC scores |          |           |           | N     | Mean score | Mean differences between ITC scores |          |           |           |
|                                                 |      |            | Crude                               | Adjusted | 95% CI    | P value   |       |            | Crude                               | Adjusted | 95% CI    | P value   |
| <i>Occupational noise exposure</i>              |      |            |                                     |          |           |           |       |            |                                     |          |           |           |
| No exposure                                     | 68   | 32.6       |                                     |          |           | Reference | 58    | 35.6       |                                     |          |           | Reference |
| Low exposure                                    | 54   | 33.7       | +1.1                                | -0.4     | -2.5, 1.8 | 0.724     | 54    | 36.0       | +0.4                                | +0.1     | -2.2, 2.5 | 0.912     |
| Moderate/high exposure                          | 53   | 34.0       | +1.4                                | -0.7     | -2.9, 1.4 | 0.498     | 67    | 35.8       | +0.2                                | -0.1     | -2.3, 2.2 | 0.962     |
| <i>Mother's working status during pregnancy</i> |      |            |                                     |          |           |           |       |            |                                     |          |           |           |
| No                                              | 25   | 30.6       |                                     |          |           | Reference | 29    | 34.8       |                                     |          |           | Reference |
| Yes                                             | 175  | 33.7       | +3.1                                | +2.9     | 0.2, 5.6  | 0.035     | 179   | 35.9       | +1.1                                | +0.7     | -2.2, 3.6 | 0.631     |
| <i>Maternal age at birth</i>                    |      |            |                                     |          |           |           |       |            |                                     |          |           |           |
| ≥35                                             | 41   | 31.0       |                                     |          |           | Reference | 47    | 35.9       |                                     |          |           | Reference |
| <35                                             | 159  | 33.9       | +2.9                                | +2.9     | 0.9, 4.9  | 0.005     | 161   | 35.7       | -0.2                                | -0.2     | -2.3, 1.9 | 0.861     |
| <i>Reading to child</i>                         |      |            |                                     |          |           |           |       |            |                                     |          |           |           |
| Occasionally                                    | 53   | 30.0       |                                     |          |           | Reference | 44    | 32.9       |                                     |          |           | Reference |
| A few times a week                              | 59   | 34.0       | +4.0                                | +3.6     | 1.4, 5.9  | 0.002     | 66    | 34.9       | +2.0                                | +1.5     | -1.0, 4.0 | 0.239     |
| Daily                                           | 88   | 34.8       | +4.8                                | +3.8     | 1.6, 6.0  | 0.001     | 98    | 37.6       | +4.7                                | +3.6     | 1.1, 6.0  | 0.004     |
| <i>Singing to child</i>                         |      |            |                                     |          |           |           |       |            |                                     |          |           |           |
| Occasionally                                    | 17   | 30.6       |                                     |          |           | Reference | 23    | 32.7       |                                     |          |           | Reference |
| A few times a week                              | 41   | 33.3       | +2.7                                | +1.3     | -2.1, 4.7 | 0.460     | 43    | 34.0       | +1.3                                | +0.5     | -2.8, 3.9 | 0.745     |
| Daily                                           | 142  | 33.6       | +3.0                                | +1.1     | -2.0, 4.3 | 0.478     | 142   | 36.8       | +4.1                                | +2.6     | -0.4, 5.6 | 0.087     |
| <i>Talking to child</i>                         |      |            |                                     |          |           |           |       |            |                                     |          |           |           |
| Daily, <1 hour                                  | 31   | 29.7       |                                     |          |           | Reference | 32    | 33.5       |                                     |          |           | Reference |
| Daily, ≥1 hour                                  | 169  | 33.9       | +4.2                                | +3.0     | 0.6, 5.4  | 0.015     | 176   | 36.2       | +2.7                                | +1.5     | -1.0, 4.0 | 0.231     |

<https://doi.org/10.1371/journal.pone.0301144.t003>

## Strengths of the study

The main strengths of our study were the use of a validated measure of language acquisition and careful, blinded assessment of exposure to noise by an experienced occupational hygiene engineer. Expert assessment, based on both questionnaires and measurements, has been considered the best approach among exposure estimation methods [38]. Our assessment relied on information regarding earlier industrial hygiene measurements in the same or similar workplaces, women's detailed descriptions of their working tasks, the level and duration of workplace noise exposure, and the women's experience of disturbing noise. Self-reported data on occupational noise exposure is suggested to be a valid source when assessing exposure [39]. The background information on noise exposure and specific work tasks during pregnancy was collected several months before the mother filled out the ITC questionnaires on language acquisition. We therefore consider it unlikely that recall bias affected the reported noise exposure during pregnancy.

The ITC is designed for screening purposes, but it has also been used in research on language acquisition [40–42]. It has shown to be able to detect developmental growth and produce relatively stable rankings of children over short periods of time [43,44]. Määttä [42] also indicated that the individual differences in the development of prelinguistic skills showed rather high stability throughout the prelinguistic period. This suggests that even one measurement may give

**Table 4. Crude and adjusted mean differences between ITC scores in three composites of language acquisition of one-year-old boys and girls by estimated noise exposure during pregnancy.** Adjusted for mother's age at birth; working status during pregnancy; and talking, reading and singing to one's child.

| Composites of language acquisition by noise exposure | Boys       |                                     |          |           |           | Girls      |                                     |          |           |           |
|------------------------------------------------------|------------|-------------------------------------|----------|-----------|-----------|------------|-------------------------------------|----------|-----------|-----------|
|                                                      | Mean score | Mean differences between ITC scores |          |           |           | Mean score | Mean differences between ITC scores |          |           |           |
|                                                      |            | Crude                               | Adjusted | 95% CI    | P value   |            | Crude                               | Adjusted | 95% CI    | P value   |
| <i>Social communication</i>                          |            |                                     |          |           |           |            |                                     |          |           |           |
| No exposure                                          | 17.8       |                                     |          |           | Reference | 18.9       |                                     |          |           | Reference |
| Low exposure                                         | 18.1       | +0.3                                | -0.5     | -1.7, 0.7 | 0.376     | 19.2       | +0.3                                | -0.1     | -1.4, 1.1 | 0.814     |
| Moderate/high exposure                               | 18.4       | +0.6                                | -0.4     | -1.6, 0.8 | 0.513     | 19.2       | +0.3                                | -0.03    | -1.2, 1.1 | 0.961     |
| <i>Speech production</i>                             |            |                                     |          |           |           |            |                                     |          |           |           |
| No exposure                                          | 5.8        |                                     |          |           | Reference | 6.9        |                                     |          |           | Reference |
| Low exposure                                         | 6.4        | +0.6                                | +0.2     | -0.6, 1.1 | 0.615     | 7.4        | +0.5                                | +0.7     | -0.2, 1.6 | 0.139     |
| Moderate/high exposure                               | 6.6        | +0.8                                | +0.1     | -0.7, 1.0 | 0.778     | 6.8        | -0.1                                | -0.003   | -0.9, 0.9 | 0.995     |
| <i>Language comprehension</i>                        |            |                                     |          |           |           |            |                                     |          |           |           |
| No exposure                                          | 9.0        |                                     |          |           | Reference | 9.8        |                                     |          |           | Reference |
| Low exposure                                         | 9.2        | +0.2                                | -0.1     | -0.8, 0.7 | 0.868     | 9.4        | -0.4                                | -0.4     | -1.3, 0.5 | 0.372     |
| Moderate/high exposure                               | 8.9        | -0.1                                | -0.5     | -1.2, 0.3 | 0.205     | 9.7        | -0.1                                | -0.02    | -0.9, 0.8 | 0.956     |

<https://doi.org/10.1371/journal.pone.0301144.t004>

**Table 5. Adjusted mean differences between ITC total scores of one-year-old children of employed mothers by estimated noise exposure and mother's occupation during pregnancy.** <sup>1</sup>Adjusted for gender of child. <sup>2</sup>Adjusted for gender of child; mother's age at birth; and talking, reading and singing to one's child. ITC total score range 0–57.

|                                      |    | ITC score                  | Mean differences between ITC scores |              |         | ITC score                  | Mean differences between ITC scores |            |         |
|--------------------------------------|----|----------------------------|-------------------------------------|--------------|---------|----------------------------|-------------------------------------|------------|---------|
| Noise exposure by occupational group | N  | Adjusted <sup>1</sup> mean | Adjusted <sup>1</sup>               | 95% CI       | P value | Adjusted <sup>2</sup> mean | Adjusted <sup>2</sup>               | 95% CI     | P value |
| Kindergarten teachers                |    |                            |                                     |              |         |                            |                                     |            |         |
| No exposure                          | 15 | 39.5                       | Reference                           |              |         | 37.3                       | Reference                           |            |         |
| Low exposure                         | 53 | 35.8                       | -3.7                                | -7.0, -0.4   | 0.030   | 33.5                       | -3.8                                | -7.2, -0.4 | 0.030   |
| Moderate exposure                    | 29 | 34.8                       | -4.7                                | -8.3, -1.1   | 0.012   | 32.4                       | -4.9                                | -8.6, -1.2 | 0.010   |
| Food industry workers                |    |                            |                                     |              |         |                            |                                     |            |         |
| No exposure                          | 12 | 32.9                       | Reference                           |              |         | 31.3                       | Reference                           |            |         |
| Low exposure                         | 19 | 33.9                       | +1.0                                | -3.8, +5.7   | 0.689   | 32.6                       | +1.3                                | -3.6, +6.2 | 0.593   |
| Moderate/high exposure               | 52 | 34.1                       | +1.2                                | -2.9, +5.3   | 0.561   | 32.8                       | +1.5                                | -2.8, +5.8 | 0.482   |
| Dental nurses                        |    |                            |                                     |              |         |                            |                                     |            |         |
| No exposure                          | 8  | 38.8                       | Reference                           |              |         | 36.7                       | Reference                           |            |         |
| Low exposure                         | 15 | 33.6                       | -5.1                                | -10.2, -0.01 | 0.050   | 33.6                       | -3.1                                | -8.1, +1.8 | 0.205   |
| Moderate exposure                    | 16 | 35.5                       | -3.2                                | -8.3, +1.9   | 0.205   | 34.0                       | -2.7                                | -7.4, +2.1 | 0.264   |
| Pharmacists                          |    |                            |                                     |              |         |                            |                                     |            |         |
| No exposure                          | 82 | 33.6                       | Reference                           |              |         | 31.3                       | Reference                           |            |         |
| Low exposure                         | 14 | 33.3                       | -0.4                                | -4.0, +3.3   | 0.847   | 31.1                       | -0.2                                | -3.8, +3.4 | 0.903   |

<https://doi.org/10.1371/journal.pone.0301144.t005>

relatively permanent data on a child's linguistic skills. Moreover, parent-report measures of communication and language skills have shown to be reliable and valid [45,46].

We considered several known determinants of language acquisition in the statistical analyses. In line with the literature, the older age of the mother and the child's male gender were associated with lower language acquisition scores in our study, which indicates its validity [20]. Speaking, reading and singing to one's child, in turn, were associated with high language acquisition scores in our data, which is also in line with earlier results [47].

This study focused on branches of work in which women are exposed to noise and obtained the data on these women from trade union registers. The women's detailed descriptions of their work during pregnancy tasks made it possible to classify them accurately by occupation for the analyses. Thus, the information on occupation was reliable. The response rate was fairly good at baseline and when the children were 12 months old.

### Limitations of the study

However, our study has some limitations. Firstly, the number of mothers exposed to occupational noise of  $\geq 85$  dB was small, precluding analyses of higher exposure levels. Secondly, we could not separately analyze exposure to low frequency noise due to a lack of frequency-specific exposure data. Thirdly, we were not able to measure individual noise exposure. Thus, some misclassification of exposure may have occurred despite the exposure being assessed by an experienced occupational hygiene engineer, who used several data sources. In addition, the frequency of women in the highest exposure group declined in the last weeks of pregnancy (after 29 pregnancy weeks). If the most critical period is the last trimester with regard to language development, this could have introduced some misclassification of exposure. However, noise exposure was undoubtedly higher in the moderate/high exposure category than in the no-exposure group. Fourthly, we cannot totally rule out the fact that selective participation may have caused bias in the results. Furthermore, there is a possibility that our assessment measures did not reveal minor difficulties in language acquisition. Finally, at the age of one, language acquisition among children may vary considerably. For these reasons, the results regarding the effect of noise exposure on language acquisition are only suggestive.

### Conclusions

This is the first study to investigate the potential association between maternal noise exposure and children's language acquisition. In general, our findings suggest no association between occupational noise exposure during pregnancy and language acquisition among one-year-old children. The children of kindergarten teachers exposed to human noise had lower language acquisition scores than the children of the non-exposed teachers, but this result should be interpreted with caution. Our suggestive findings warrant future studies by level and type of exposure.

### Supporting information

**S1 Checklist.** *PLOS ONE* clinical studies checklist.

(DOCX)

**S2 Checklist.** STROBE statement—checklist of items that should be included in reports of observational studies.

(DOCX)

**S1 File.**

(PDF)

## Acknowledgments

The authors would like to thank Editor Alice Lehtinen from Altexta for revising the language of this paper. We also gratefully acknowledge the cooperation of the participants.

## Author Contributions

**Conceptualization:** Soile Jungewelter, Minna Huutilainen, Eira Jansson-Verkasalo.

**Data curation:** Jouko Remes.

**Formal analysis:** Jouko Remes.

**Investigation:** Soile Jungewelter.

**Methodology:** Markku Sallmén, Marja-Liisa Lindbohm, Erkkö Airo, Eira Jansson-Verkasalo.

**Project administration:** Soile Jungewelter.

**Supervision:** Helena Taskinen, Marja-Liisa Lindbohm.

**Writing – original draft:** Soile Jungewelter, Helena Taskinen, Marja-Liisa Lindbohm.

**Writing – review & editing:** Soile Jungewelter, Markku Sallmén, Eira Jansson-Verkasalo.

## References

1. Gerhardt KJ, Abrams RM, Huang X, Griffiths SK, Peters AJ. Intra-abdominal sound pressure levels during impulse noise exposure in sheep. *Mil Med* 2000; 165:153–156. PMID: [10709379](#)
2. Gerhardt KJ, Abrams RM. Fetal exposures to sound and vibroacoustic stimulation. *J Perinat* 2000; 20:20–9. <https://doi.org/10.1038/sj.jp.7200446> PMID: [11190697](#)
3. Huutilainen M, Kujala A, Hotakainen M, Shestakova A, Kushnerenko E, Parkkonen L, et al. Auditory magnetic responses of healthy newborns. *Neuroreport* 2003; 14:1871–5. <https://doi.org/10.1097/00001756-200310060-00023> PMID: [14534438](#)
4. Kim CH, Lee SC, Shin JW, Chung KJ, Lee SH, Sin MS, et al. Exposure to music and noise during pregnancy influences neurogenesis and thickness in motor and somatosensory cortex of rat pups. *Int Neurol J* 2013; 17:107–13. <https://doi.org/10.5213/inj.2013.17.3.107> PMID: [24143288](#)
5. Kim H, Lee MH, Chang HK, Lee TH, Lee HH, Shin MC, et al. Influence of prenatal noise and music on the spatial memory and neurogenesis in the hippocampus of developing rats. *Brain Dev* 2006; 28:109–14. <https://doi.org/10.1016/j.braindev.2005.05.008> PMID: [16181757](#)
6. Huutilainen M. Building blocks of fetal cognition: emotion and language. *Infant Child Dev* 2010;19: 1:94–8.
7. Partanen E, Kujala T, Näätänen R, Liitola A, Sambeth A, Huutilainen M. Learning-induced neural plasticity of speech processing before birth. *Proceedings of the National Academy of Sciences USA* 2013<sup>b</sup>; 110:15145–50. <https://doi.org/10.1073/pnas.1302159110> PMID: [23980148](#)
8. Rand K, Lahav A. Impact of the NICU environment on language deprivation in preterm infants. *Acta Paediatr* 2014; 103:243–8. <https://doi.org/10.1111/apa.12481> PMID: [24164604](#)
9. Kujala T, Brattico E. Detrimental noise effects on brain's speech functions. *Biol Psychol* 2009; 81:135–43. <https://doi.org/10.1016/j.biopsycho.2009.03.010> PMID: [19482230](#)
10. Niemitalo-Haapola E, Haapala S, Kujala T, Raappana A, Kujala T, Jansson-Verkasalo E. Noise equally degrades central auditory processing in 2- and 4-year-old children. *J Speech Lang Hear Res* 2017; 60:2297–309. [https://doi.org/10.1044/2017\\_JSLHR-H-16-0267](https://doi.org/10.1044/2017_JSLHR-H-16-0267) PMID: [28763806](#)
11. Jansson-Verkasalo E, Ruusuvirta T, Huutilainen M, Alku P, Kushnerenko E, Suominen K, et al. Atypical perceptual narrowing in prematurely born infants is associated with compromised language acquisition at 2 years of age. *BMC Neurosci* 2010; 11:88. <https://doi.org/10.1186/1471-2202-11-88> PMID: [20673357](#)
12. Kuhl PK, Conboy BT, Coffey-Corina S, Padden D, Rivera-Gaxiola M, Nelson T. Phonetic learning as a pathway to language: New data and native language magnet theory expanded (NLM-e). *Philosophical transactions of the Royal Society of London. Series B, Biological sciences Royal Society (Great Britain)* 2008; 363:979–1000. <https://doi.org/10.1098/rstb.2007.2154> PMID: [17846016](#)



13. Kraus N, Hornickel J, Strait DL, Slater J, Thompson E. Engagement in community music classes sparks neuroplasticity and language development in children from disadvantaged backgrounds. *Front Psychol* 2014; 16:1–9. <https://doi.org/10.3389/fpsyg.2014.01403> PMID: 25566109
14. Paavola L, Kemppinen K, Kumpulainen K, Moilanen I, Ebeling H. Maternal sensitivity, infant co-operation and early linguistic development: Some predictive relations. *Eur J Dev Psychol* 2006; 3:13–30.
15. Pineda R, Guth R, Herring A, Reynolds I, Oberle S, Smith J. Enhancing sensory experiences for very preterm infants in the NICU: an integrative review. *J Perinatol* 2017; 37:323–32. <https://doi.org/10.1038/jp.2016.179> PMID: 27763631
16. Schön D, Boyer M, Moreno S, Besson M, Peretz I, Kolinsky R. Songs as an aid for language acquisition. *Cognition* 2008; 106:975–83. <https://doi.org/10.1016/j.cognition.2007.03.005> PMID: 17475231
17. Webb AR, Heller HT, Benson CB, Lahav A. Mother's voice and heartbeat sounds elicit auditory plasticity in the human brain before full gestation. *Proceedings of the National Academy of Sciences USA* 2015; 112:3152–7. <https://doi.org/10.1073/pnas.1414924112> PMID: 25713382
18. Shi LF. Perception of acoustically degraded sentences in bilingual listeners who differ in age of English acquisition. *J Speech Lang Hear Res* 2010; 53:821–35. [https://doi.org/10.1044/1092-4388\(2010\)09-0081](https://doi.org/10.1044/1092-4388(2010)09-0081) PMID: 20220026
19. Korpilahti P, Kaljonen A, Jansson-Verkasalo E. Population-Based Screening for Language Delay: Let's Talk STEPS Study. *Psych* 2016; 7:215–4.
20. Daniel T, Laciak J. Clinical observations and experiments concerning the condition of the cochleovestibular apparatus of subjects exposed to noise in fetal life. *Rev Laryngol Otol Rhinol (Bord)* 1982; 103:313–8. French.
21. Lalande NM, Héту R, Lambert J. Is occupational noise exposure during pregnancy a risk factor of damage to the auditory system of the fetus? *Am J Ind Med* 1986; 10:427–35. <https://doi.org/10.1002/ajim.4700100410> PMID: 3788986
22. Rocha EB, Frasson de Azevedo M, Ximenes Filho JA. Study of the hearing in children born from pregnant women exposed to occupational noise: Assessment by distortion product otoacoustic emissions. *Braz J Otorhinolaryngol* 2007; 73:359–69. [https://doi.org/10.1016/s1808-8694\(15\)30080-x](https://doi.org/10.1016/s1808-8694(15)30080-x) PMID: 17684657
23. Selander J, Albin M, Rosenhall U, Rylander L, Lewné M, Gustavsson P. Maternal occupational exposure to noise during pregnancy and hearing dysfunction in children: A Nationwide Prospective Cohort Study. *Environ Health Perspect* 2016; 124:855–60.
24. Kauppinen T, Hanhela R, Kandolin I, Karjalainen A, Kasvio A, Perkiö-Mäkelä M, et al. Editors. *Work and Health in Finland 2009 (Työ ja terveys Suomessa 2009)*. The Finnish Institute of Occupational Health 2009. ISBN 978-951-802-943-7, ISBN 978-802-952-9 (PDF). Vammalan Kirjapaino Oy, Sastamala 2010. Finnish.
25. Neitzel R, Seixas NS, Camp J, Yost M. An assessment of occupational noise exposures in four construction trades. *Am Ind Hyg Assoc J* 1999; 60:807–17. <https://doi.org/10.1080/00028899908984506> PMID: 10635548
26. Elo AL, Leppänen A, Jahkola A. Validity of a single-item measure of stress symptoms. *Scand J Work Environ Health* 2003; 29:444–51. <https://doi.org/10.5271/sjweh.752> PMID: 14712852
27. Wetherby AM, Prizant BM. *Communication and Symbolic Behavior Scales Developmental Profile. Infant/Toddler Checklist*. Paul H. Brookes Publishing Co. 2001.
28. Laakso ML, Eklund K, Poikkeus AM. *Infant Toddler Checklist (ITC) for Finnish Language. (Esikko. Lap sen esikielellisen kommunikaation ja kielen ensikartoitus)*. Niilo Mäki Instituutti 2010. ISBN: 978-951-39-4128-4. Finnish.
29. Sala E, Airo E, Olkinuora P, Simberg S, Ström U, Laine A, et al. J. Vocal loading among day care center teachers. *Logoped Phoniatr Vocol* 2002; 27:21–8.
30. Toppila E, Starck J, Koskinen H, Pyykkö I. *Classical music and hearing protection. (Klassinen musiikki ja kuulonsuojelu)*. Työympäristötutkimuksen raporttisarja 10. Finnish Institute of Occupational Health 2004. ISBN 951-802-591-6, ISSN 1458-9311. Finnish.
31. Rytönen E. *High Frequency Vibration and Noise in Dentistry*. Doctoral dissertation. Department of Environmental Sciences. University of Kuopio 2005. ISBN 951-781-318-X.
32. Dutta A, Mala K, Acharya SR. Sound levels in conservative dentistry and endodontic clinics. *J Conserv Dent* 2013; 16:121–5.
33. Laplante DP, Barr RG, Brunet A, Galbaud duFort G, Meaney ML, Saucier JF, et al. Stress during pregnancy affects general intellectual and language functioning in human toddlers. *Ped Res* 2004; 56:400–10. <https://doi.org/10.1203/01.PDR.0000136281.34035.44> PMID: 15240860
34. Patel AD. *Music, language, and the brain*. Oxford University Press 2007. ISBN-13: 9780195123753. DOI: [10.1093/acprof:oso/9780195123753.001.0001](https://doi.org/10.1093/acprof:oso/9780195123753.001.0001).

35. Cook RO, Konishi T, Salt AN, Hamm CW, Lebetkin EH, Koo J. Brainstem-evoked responses of guinea pigs exposed to high noise levels in utero. *Dev Psychobiol* 1982; 15:95–104. <https://doi.org/10.1002/dev.420150202> PMID: 7095284
36. Gerhardt KJ, Pierson LL, Huang X, Abrams RM, Rarey KE. Effects of intense noise exposure on fetal sheep auditory brain stem response and inner ear histology. *Ear Hear* 1999; 20:21–32. <https://doi.org/10.1097/00003446-199902000-00003> PMID: 10037063
37. Woods C, Montcouquiol M, Kelley MW. Math1 regulates development of the sensory epithelium in the mammalian cochlea. *Nat Neurosci* 2004; 12:1310–8. <https://doi.org/10.1038/nn1349> PMID: 15543141
38. Teschke K, Olshan AF, Daniels JL, De Roos AJ, Parks CG, Schulz M, et al. Occupational exposure assessment in case-control studies: opportunities for improvement. *Occup Environ Med* 2002; 59:575–93; discussion 594. Review. <https://doi.org/10.1136/oem.59.9.575> PMID: 12205230
39. Schlaefer K, Schlehofer B, Schüz J. Validity of self-reported occupational noise exposure. *Eur J Epidemiol* 2009; 24:469–75. <https://doi.org/10.1007/s10654-009-9357-4> PMID: 19543796
40. Määttä S, Laakso ML, Tolvanen A, Ahonen T, Aro T. Developmental trajectories on early communication skills. *J Speech Lang Hear Res* 2012; 44:873–85.
41. Määttä S, Laakso ML, Tolvanen A, Ahonen T, Aro T. Children With Differing Developmental Trajectories of prelinguistic Communication Skills: Language and Working Memory at Age 5. *J Speech Lang Hear Res* 2014; 57:1026–39.
42. Määttä S, Laakso ML, Ahonen T, Tolvanen A, Westerholm J, Aro T. Continuity from Prelinguistic Communication to Later Language Ability: A Follow-Up Study From Infancy to Early School Age. *J Speech Lang Hear Res* 2016; 59:1357–72. [https://doi.org/10.1044/2016\\_JSLHR-L-15-0209](https://doi.org/10.1044/2016_JSLHR-L-15-0209) PMID: 27788278
43. Reilly S, Eadie P, Bavin EL, Wake M, Prior M, Williams J, et al. Growth of infant communication between 8 and 12 months: a population study. *J Paed Child Health* 2006; 42:764–70. <https://doi.org/10.1111/j.1440-1754.2006.00974.x> PMID: 17096710
44. Wetherby AM, Allen L, Cleary J, Kublin K, Goldstein H. Validity and reliability of the communication and symbolic behavior scales developmental profile with very young children. *J Speech Lang Hear Res* 2002; 45:1202–18. [https://doi.org/10.1044/1092-4388\(2002/097\)](https://doi.org/10.1044/1092-4388(2002/097)) PMID: 12546488
45. Feldman HM, Dale PS, Campbell TF, Colborn DK, Kurs-Lasky M, Rockette HE, Paradise JL, et al. Concurrent and predictive validity of parent reports of child language at ages 2 and 3 years. *Child Dev* 2005; 76:856–68. <https://doi.org/10.1111/j.1467-8624.2005.00882.x> PMID: 16026501
46. Laakso ML, Poikkeus J, Katajamäki J, Lyytinen P. Early intentional communication as a predictor of language development in young toddlers. *First Lang* 1999; 19:207–31.
47. Kalb G, van Ours J. Reading to Young Children: A Head-Start in Life? *Econ Educ Rev* 2014; 40:1–24.
